# Supplementary material for: Mn 2+ -assisted high-capacity retention in iron–chromium flow batteries via hydrogen evolution inhibition and Cr 3+ /Cr 2+ activation
Source: Royal Society of Chemistry journal article supplement (doi:10.1039/d5ra09027j), 2026-01-01
Supplement: d5ra09027j5.pdf [file d5ra09027j5.pdf]

## Supporting Information

### **Mn<sup>2+</sup>-Assisted High-Capacity Retention in Iron-Chromium Flow Batteries via Hydrogen Evolution Inhibition and Cr<sup>3+</sup>/Cr<sup>2+</sup> Activation**

Tian-Ying Zhang <sup>a, b</sup>, Zheng-Rong Niu <sup>c</sup>, Bo Li <sup>c</sup>, Yuan-Yuan Cui <sup>d</sup>, Nai-Cai Xu <sup>a, b\*</sup>,  
Xin-Qian Li <sup>c</sup>, Shao-Ju Bian <sup>a, b</sup>, Ya-Ping Dong <sup>c</sup>, Hai-Tao Feng <sup>c\*</sup>, Yan-Feng Gao <sup>d\*</sup>

<sup>a</sup> School of Chemistry and Chemical Engineering, Qinghai Normal University, Xining 810008.China

<sup>b</sup> Qinghai Key Laboratory of Advanced Technology and Application of Environmental Functional Materials, Xining 810016, China

<sup>c</sup> Key Laboratory of Green and High-end Utilization of Salt Lake Resources, Qinghai Engineering and Technology Research Center of Comprehensive Utilization of Salt Lake Resources, Qinghai Institute of Salt Lakes, Chinese Academy of Sciences, Xining, Qinghai 810008, China

<sup>d</sup> School of Materials Science and Engineering, Shanghai University, Shanghai

\*Corresponding authors

Email address: xunc@qhnu.edu.cn (Nai-Cai Xu); fenght@isl.ac.cn (Hai-Tao Feng)  
yfgao@shu.edu.cn (Yan-Feng Gao)

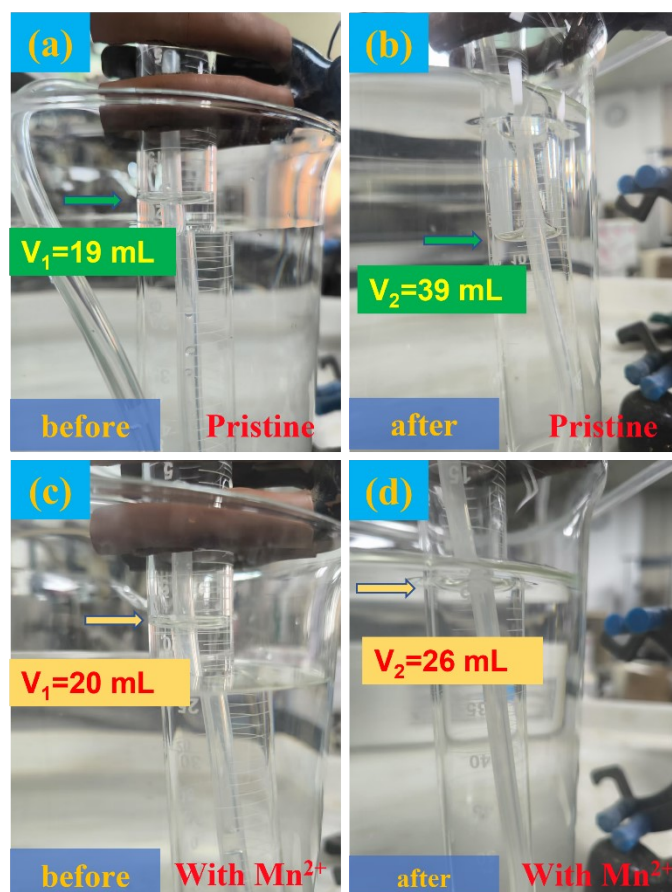

**Fig. S1.** The amount of hydrogen produced by the manganese-containing system and the blank control group was measured at  $40 \text{ mA cm}^{-2}$ : (a) uncycled and (b) cycled for 20 cycles at  $40 \text{ mA cm}^{-2}$ , and the pristine electrolyte with  $0.002 \text{ M Mn}^{2+}$ : (c) uncycled and (d) cycled for 20 cycles at  $40 \text{ mA cm}^{-2}$ .

The generated hydrogen was collected via water displacement, with the initial water level maintained at 20 mL to ensure experimental consistency. The results showed that after 20 charge-discharge cycles, the hydrogen production was significantly reduced (from 20 mL to 6 mL) after the addition of  $\text{Mn}^{2+}$ , confirming the inhibitory effect of manganese ions on HER.

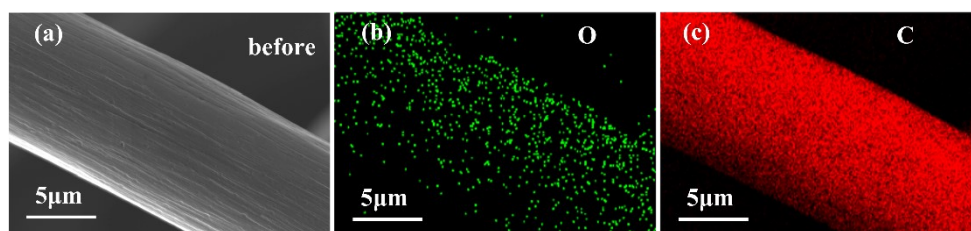

**Fig. S2.** SEM and EDS of graphite felt before charge (a) SEM; (b) O; (c) C.

The pristine graphite felt exhibited a characteristic fibrous morphology, with individual fibers measuring approximately 10  $\mu\text{m}$  in diameter. The elemental distribution appeared homogeneous throughout the material, while the fiber surfaces displayed pronounced groove-like textures.

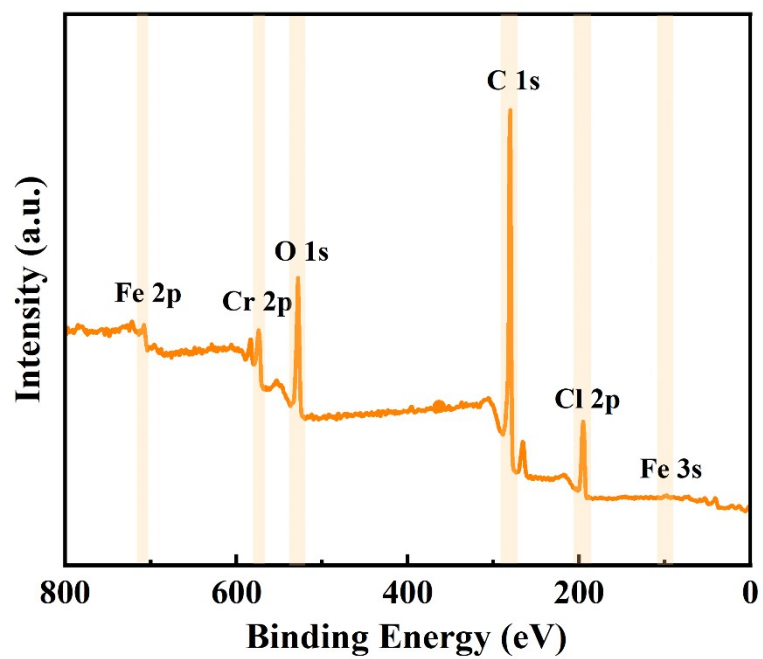

**Fig. S3.** XPS Spectra of Electrode after Cycling in Electrolyte Containing  $\text{Mn}^{2+}$
