# Supplementary figures and images for: Mn 2+ -assisted high-capacity retention in iron–chromium flow batteries via hydrogen evolution inhibition and Cr 3+ /Cr 2+ activation
Source: Royal Society of Chemistry journal article supplement (doi:10.1039/d5ra09027j), 2026-01-01

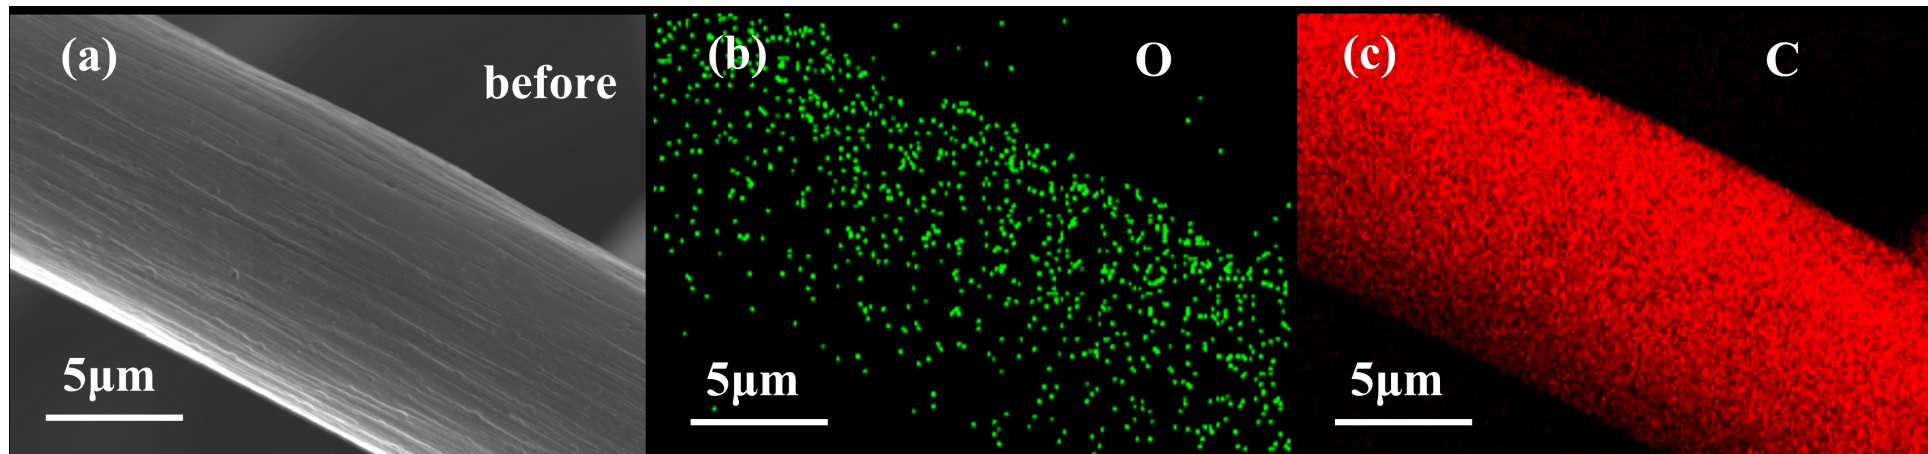

Supplement: d5ra09027j3.pdf [file d5ra09027j3.pdf]

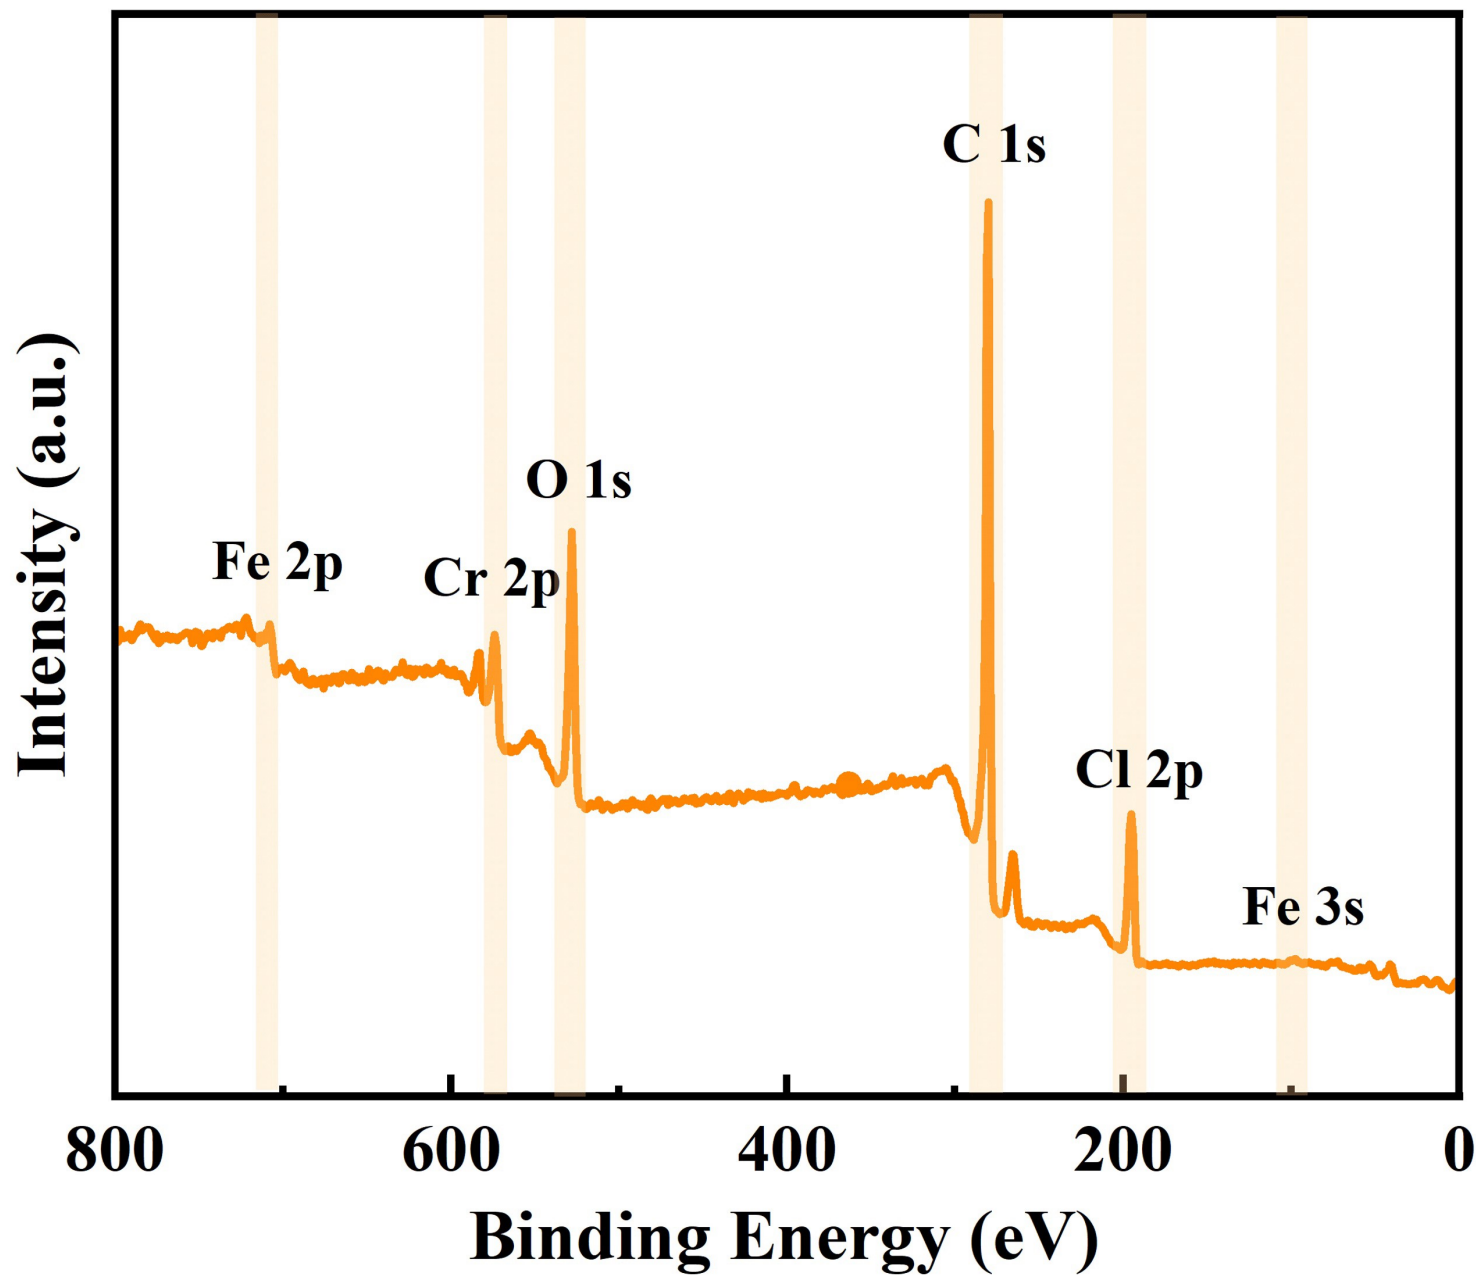

Supplement: d5ra09027j4.pdf [file d5ra09027j4.pdf]
